# Supplementary material
Source: Springer Nature journal article supplement (https://www.springermedizin.de/resource/supplementary/12876_2009_388_MOESM5_ESM.pdf/9439306)
Supplement: MOESM5 [file 9439306]

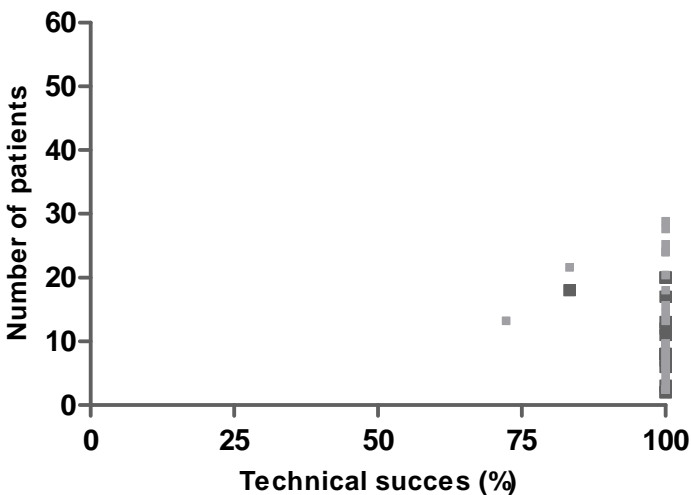

Mann-Whitney U-test:

$p = 0.414$

a. Spearman's rank correlation test:

$r = -0.218, p = 0.435$

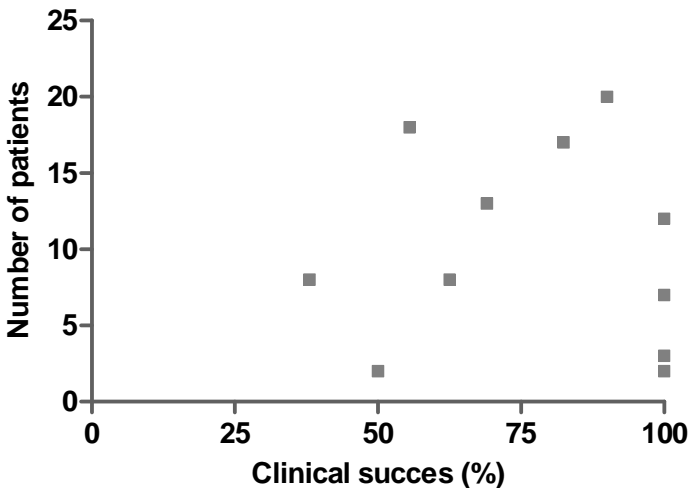

Mann-Whitney U-test:

$p = 0.779$

b. Spearman's rank correlation test:

$r = -0.089, p = 0.796$
